# Supplementary material for: Health improvements of type 2 diabetic patients through diet and diet plus fecal microbiota transplantation
Source: PubMed Central journal article supplement (PMC8782834; doi:10.1038/s41598-022-05127-9), 2022-01-21
Supplement: 41598_2022_5127_MOESM1_ESM.pdf [file 41598_2022_5127_MOESM1_ESM.pdf]

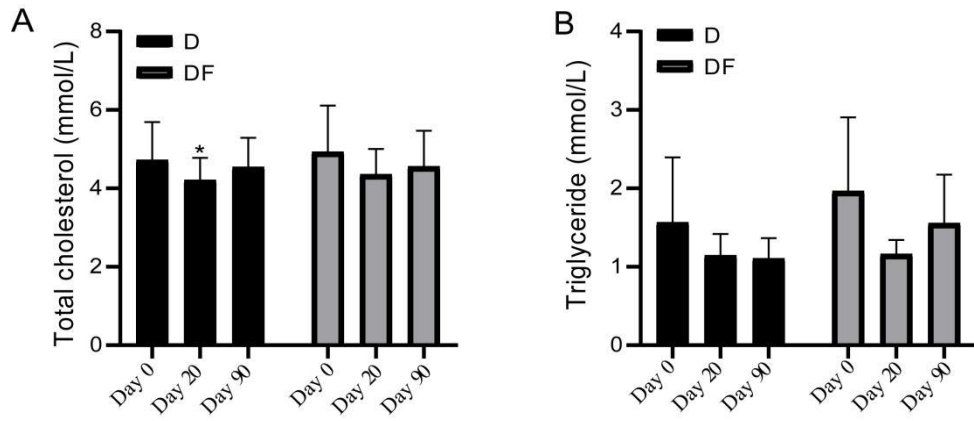

**Supplementary Figure 1.** Biochemical indices changed by treatments. (A) The levels of total cholesterol at different time points in each group. (B) The levels of triglyceride at different time points in each group. \* $p < 0.05$  vs baseline. Two-tailed Student's t-test for paired-samples.
